# Supplementary material for: High-Density and Monodisperse Electrochemical Gold Nanoparticle Synthesis Utilizing the Properties of Boron-Doped Diamond Electrodes
Source: MDPI journal article supplement (doi:10.3390/nano12101741), 2022-05-19
Supplement: s1 [file s1]

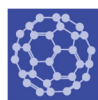

## Supplementary Materials

# High-Density and Monodisperse Electrochemical Gold Nanoparticle Synthesis Utilizing the Properties of Boron-Doped Diamond Electrodes

Kenshin Takemura \*, Wataru Iwasaki, Nobutomo Morita and Shinya Ohmagari

Sensing System Research Center, The National Institute of Advanced Industrial Science and Technology (AIST), Tosu 841-0052, Japan; wataru.iwasaki@aist.go.jp (W.I.); morita.nobutomo@aist.go.jp (N.M.); shinya.ohmagari@aist.go.jp (S.O.)

\* Correspondence: takemura.kenshin@aist.go.jp; Tel.: +81-942-81-3619

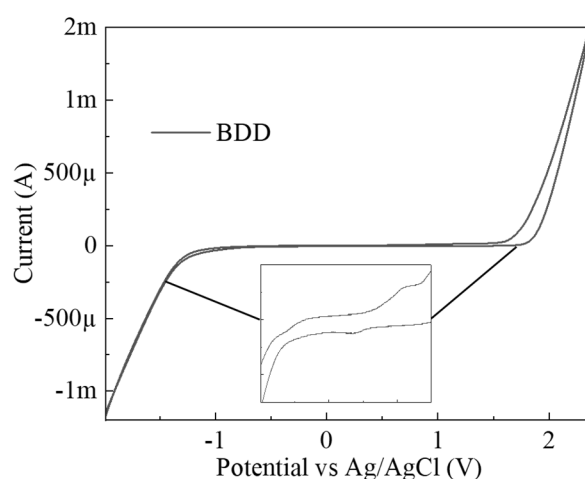

**Figure S1.** Potential window in AcONa of the BDD measured using cyclic voltammetry. The voltage was swept from  $-2.0$  to  $2.4$  V with a scan rate  $0.2$  V/sec.

**Table S1.** Particle size and number of AuNPs electrodeposited at different durations. The particle analysis was performed using ImageJ.

|       | Average Particle Size (nm) | Particle Number/ $\mu\text{m}^2$ |
|-------|----------------------------|----------------------------------|
| 30 s  | $42 \pm 6$                 | $141 \pm 3$                      |
| 60 s  | $56 \pm 5$                 | $132 \pm 7$                      |
| 90 s  | $120 \pm 10$               | $82 \pm 7$                       |
| 120 s | $90 \pm 10$                | $50 \pm 10$                      |

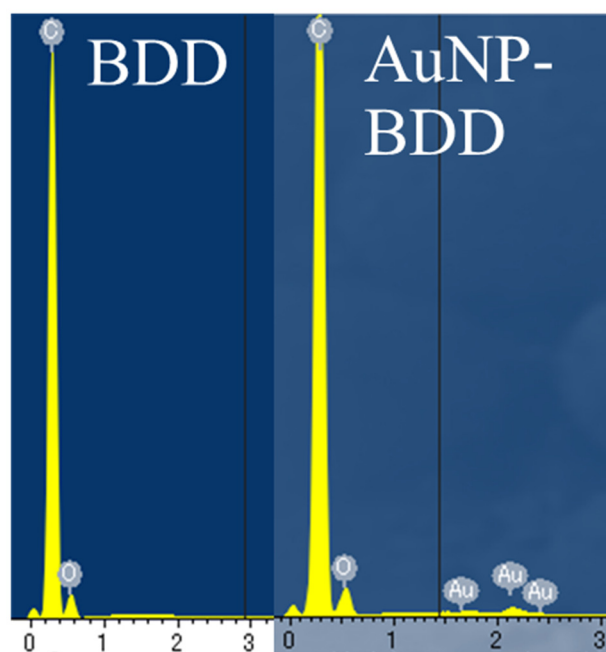

Figure S2. EDX analysis to confirm Au deposition on BDD.

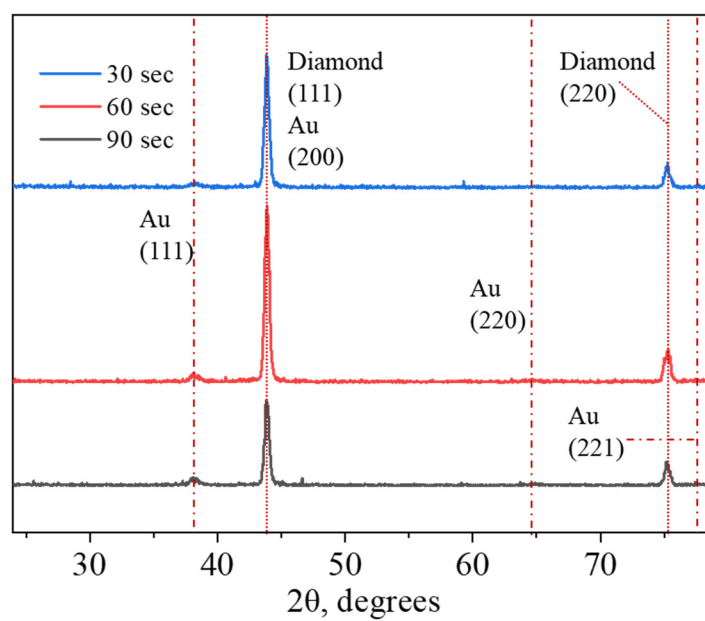

Figure S3. XRD patterns of AuNP-modified BDD samples at different synthesis durations.

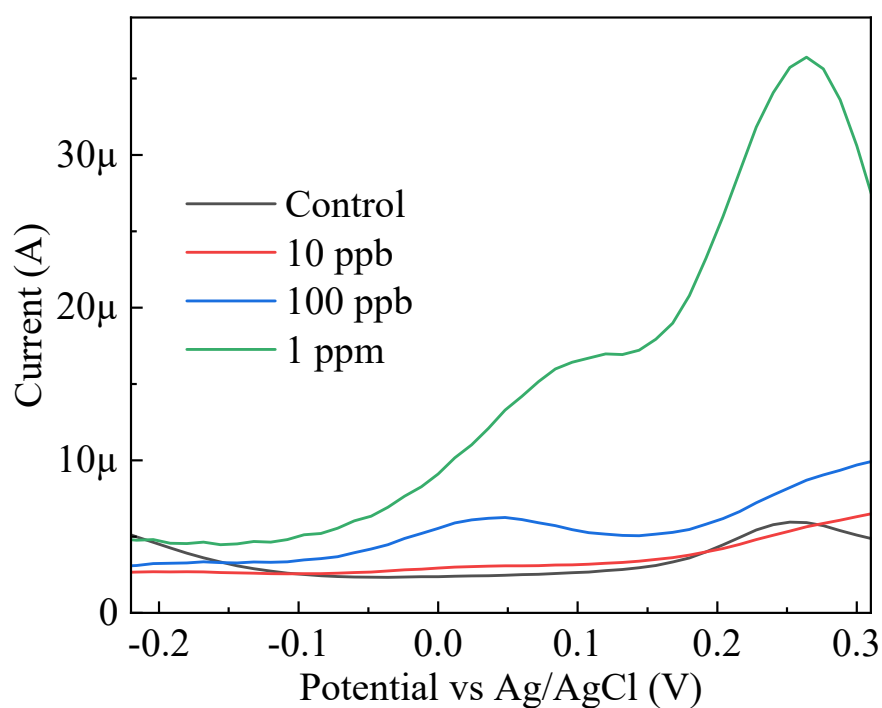

**Figure S4.** Electrochemical detection of As(III) using BDD in AcONa under the same SWASV condition as with AuNP-BDD.

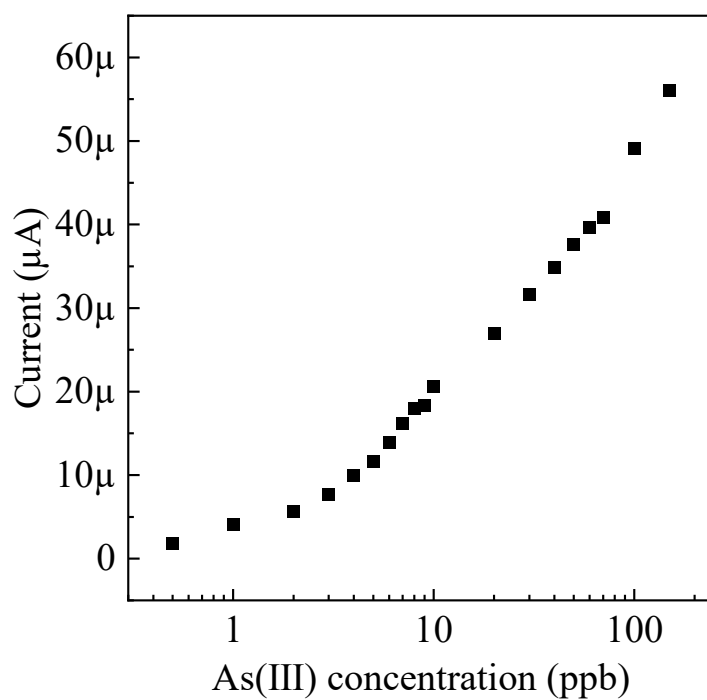

**Figure S5.** Current peak value plot for the electrochemical detection of As(III) in AcONa.

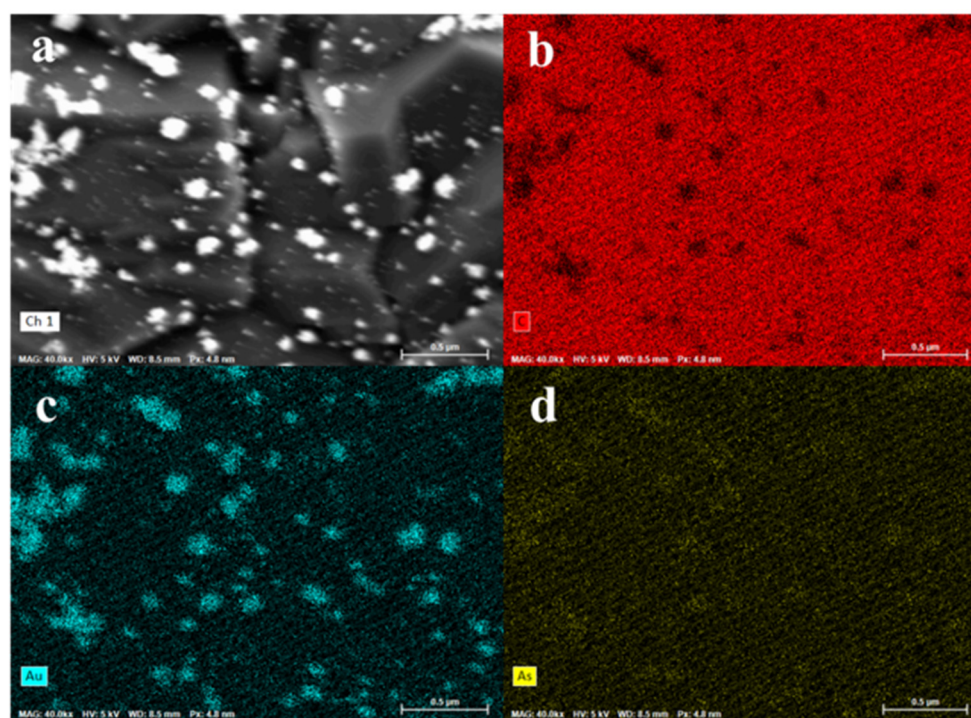

**Figure S6.** EDX maps of AuNP-BDD after As(III) detection. (a) Image obtained in normal SEM mode. (b–d) Mapping result of C, Au, and As.
